# Supplementary material for: Effect of chain architecture and comonomer ratio on the biodegradability and thermal stability of biodegradable copolymers of l-lactide and δ-valerolactone
Source: Royal Society of Chemistry journal article supplement (doi:10.1039/d3gc04140a), 2024-01-01
Supplement: d3gc04140a1.pdf [file d3gc04140a1.pdf]

## Supporting Information

**Table S1** Characterization of the homopolymers and copolymers of different compositions and initiators synthesized at 165 °C in a sequential bulk.

| Sample               | Reaction time |    | <sup>1</sup> H-NMR conversion |     | Feeding composition |     | <sup>1</sup> H-NMR composition |     |
|----------------------|---------------|----|-------------------------------|-----|---------------------|-----|--------------------------------|-----|
|                      | LA            | VL | LA                            | VL  | LA                  | VL  | LA                             | VL  |
|                      | (min)         |    | (%)                           |     | mole ratio          |     | mole ratio                     |     |
| <sup>a</sup> Cy-PLA  | 30            | -  | 100                           | -   | 1                   | 0   | 1                              | 0   |
| <sup>a</sup> Cy-L7V3 | 30            | 60 | 97                            | 57  | 0.7                 | 0.3 | 0.9                            | 0.1 |
| <sup>a</sup> Cy-L5V5 | 30            | 60 | 98                            | 96  | 0.5                 | 0.5 | 0.6                            | 0.4 |
| <sup>a</sup> Cy-L3V7 | 30            | 60 | 96                            | 96  | 0.3                 | 0.7 | 0.3                            | 0.7 |
| <sup>a</sup> Cy-PVL  | -             | 60 | -                             | 100 | 0                   | 1   | 0                              | 1   |
| <sup>b</sup> Li-PLA  | 30            | -  | -                             | -   | 1                   | 0   | 1                              | 0   |
| <sup>b</sup> Li-L5V5 | 30            | 60 | 98                            | 98  | 0.5                 | 0.5 | 0.6                            | 0.4 |
| <sup>b</sup> Li-PVL  | -             | 60 | -                             | 100 | 0                   | 1   | 0                              | 1   |

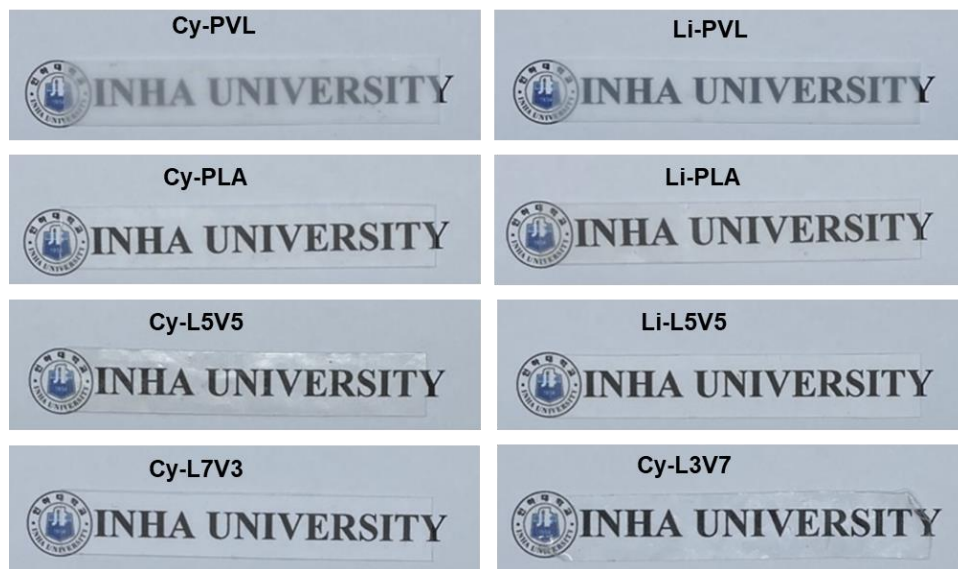

Figure S1. Optical transmittance of all the obtained PLLA homopolymers and LnVm copolymers synthesized from Table S1.

➤ The number-average sequence lengths ( $l_i$ ) of LA and VL units

$$l_{LA} = \frac{2(LA)}{(LA-VL)}; \quad l_{VL} = \frac{2(VL)}{(LA-VL)}; \quad (LA - VL) = 2 \left( \frac{(A_{2.37} + A_{4.08})}{2} - A_{5.12} + \frac{(A_{2.27} + A_{2.37} + A_{4.01} + A_{4.08})}{2} \right)$$

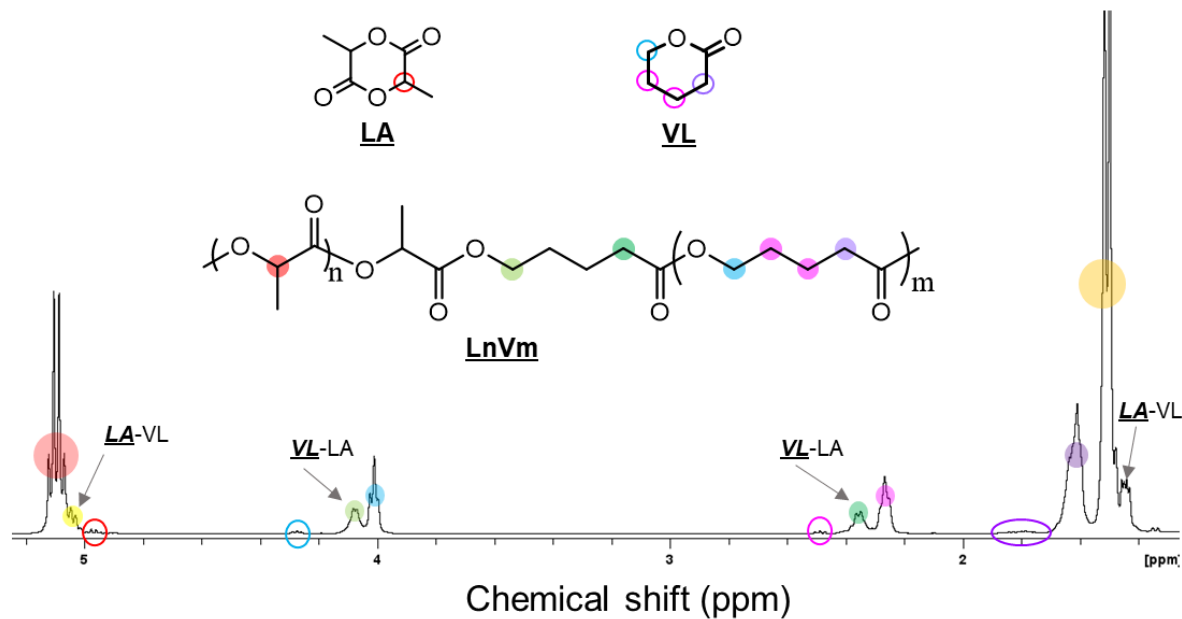

Figure S2. The representative of  $^1\text{H}$  NMR spectra of  $\text{LnVm}$  copolymers for calculating the number-average sequence lengths of LA and VL.

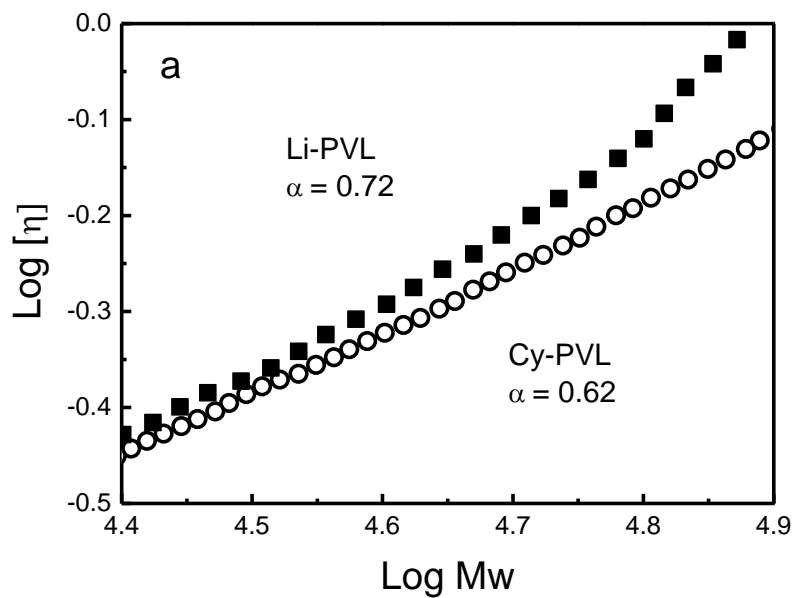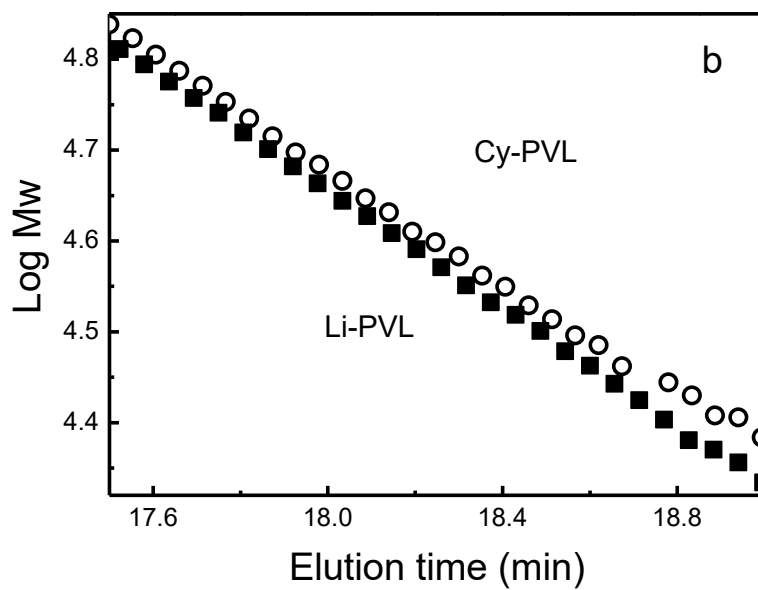

Figure S3. The double logarithmic plot of intrinsic viscosity against molecular weight (a) and the plot of logarithm molecular weight against elution time (b) of PVL homopolymers; where ■ = initiated by BnOH and ○ = initiated by salicylic acid.

DSC testing

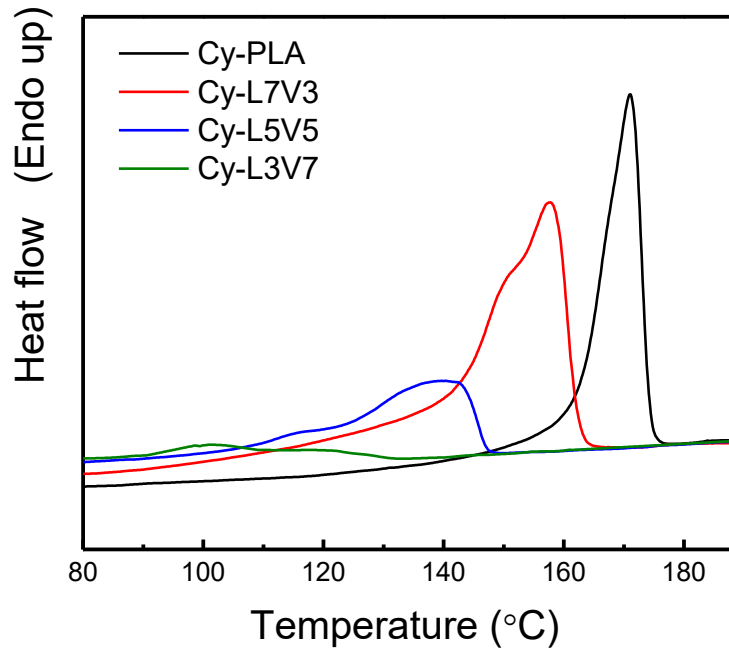

Figure S4. First heating calorimetric thermograms for the composting degraded samples; Cy-PLA, Cy-L7V3, Cy-L5V5, and Cy-L3V7 at the different incubation times in composting conditions at 58 °C.

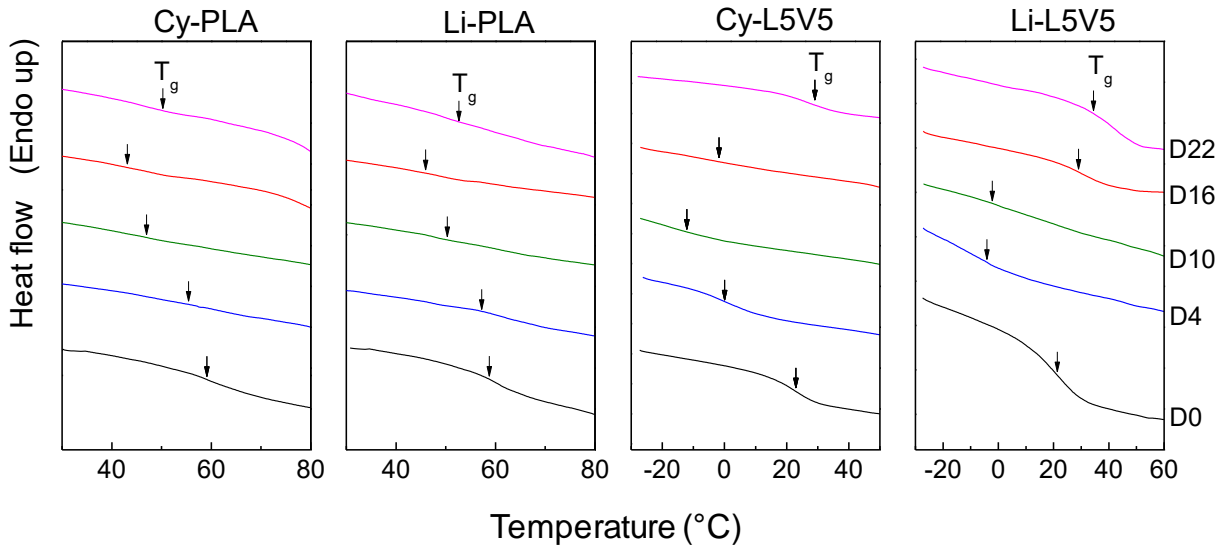

Figure S5. Cooling calorimetric thermograms for the composting degraded samples; Cy-PLA (a), Li-PLA (b), Cy-L5V5 (c), and Li-L5V5 (d) after different incubation times.

**Table S2** GPC traces for the composting degraded samples; PLA homopolymers and L5V5 copolymers at the different incubation times.

| <b>Sample</b>  | <b>Time</b><br>(Day) | <b>M<sub>w</sub></b><br>(g/mol) | <b>M<sub>n</sub></b><br>(g/mol) | <b>M<sub>w</sub>/ M<sub>n</sub></b> |
|----------------|----------------------|---------------------------------|---------------------------------|-------------------------------------|
| <b>Cy-PLA</b>  | 0                    | 161,558                         | 65,054                          | 2.48                                |
|                | 4                    | 58,281                          | 21,501                          | 2.71                                |
|                | 10                   | 16,514                          | 6,671                           | 2.48                                |
|                | 16                   | 3,183                           | 2,556                           | 1.25                                |
|                | 22                   | 2,705                           | 2,259                           | 1.20                                |
| <b>Li-PLA</b>  | 0                    | 157,779                         | 60,006                          | 2.63                                |
|                | 4                    | 72,464                          | 28,512                          | 2.54                                |
|                | 10                   | 20,228                          | 9,253                           | 2.19                                |
|                | 16                   | 4,899                           | 3,641                           | 1.35                                |
|                | 22                   | 3,832                           | 3,080                           | 1.24                                |
| <b>Cy-L5V5</b> | 0                    | 62,260                          | 28,315                          | 2.20                                |
|                | 4                    | 12,109                          | 5,872                           | 2.06                                |
|                | 10                   | 3,718                           | 1,681                           | 2.21                                |
|                | 16                   | 1,953                           | 1,483                           | 1.32                                |
|                | 22                   | -                               | -                               | -                                   |
| <b>Li-L5V5</b> | 0                    | 68,379                          | 31,854                          | 2.15                                |
|                | 4                    | 13,400                          | 6,078                           | 2.20                                |
|                | 10                   | 4,495                           | 2,326                           | 1.93                                |
|                | 16                   | 3,011                           | 1,641                           | 1.83                                |
|                | 22                   | 1,363                           | 1,168                           | 1.17                                |

**Table S3** Summary of the DSC scan data for the samples collected at various incubation times

|          | Time<br>(Day) | 1 <sup>st</sup> heating |             |              | 1 <sup>st</sup> cooling |       | $X_c$<br>(%) |
|----------|---------------|-------------------------|-------------|--------------|-------------------------|-------|--------------|
|          |               | $T_{cc}$                | $T_m$       | $\Delta H_m$ | $T_g$                   | $T_c$ |              |
|          |               | (°C)                    | (°C)        | (J/g)        | (°C)                    | (°C)  |              |
| Cy-PLA   | 0             | -                       | 173.5       | 44.2         | 59.1                    | 119.4 | 41.7         |
|          | 4             | -                       | 170.9       | 59.8         | 55.5                    | 107.1 | 56.4         |
|          | 10            | -                       | 162.4       | 85.6         | 47.1                    | 118.9 | 80.8         |
|          | 16            | -                       | 155.6       | 90.8         | 43.2                    | 105.6 | 85.7         |
|          | 22            | -                       | 153.6       | 91.9         | 50.5                    | 105.5 | 86.7         |
| Li-PLA   | 0             | -                       | 175.3       | 45.2         | 58.5                    | 102.4 | 42.6         |
|          | 4             | -                       | 173.4       | 56.6         | 57.2                    | 111.1 | 53.4         |
|          | 10            | -                       | 166.6       | 70.2         | 50.3                    | 119.6 | 66.2         |
|          | 16            | -                       | 160.5       | 77.1         | 45.6                    | 118.5 | 72.7         |
|          | 22            | -                       | 162.8       | 78.4         | 52.7                    | 114.7 | 74.0         |
| Cy- L5V5 | 0             | 84.5                    | 138.6       | 21.3         | 22.9                    | -     | 29.4         |
|          | 4             | -                       | 139.6       | 26.9         | -0.7                    | 92.9  | 37.1         |
|          | 10            | -                       | 136.7       | 38.9         | -13.2                   | 92.7  | 53.7         |
|          | 16            | -                       | 123.7       | 51.1         | -1.76                   | 72.4  | 70.6         |
|          | 22            | -                       | 107.5,117.7 | 53.9         | 28.8                    | -     | 74.4         |
| Li- L5V5 | 0             | -                       | 150.6       | 24.6         | 21.2                    | 85.2  | 34.0         |
|          | 4             | -                       | 151.7       | 39.9         | -4.3                    | 99.9  | 55.1         |
|          | 10            | -                       | 139.3       | 42.8         | -2.3                    | 89.4  | 59.1         |
|          | 16            | -                       | 133.1       | 52.5         | 30.5                    | -     | 72.5         |
|          | 22            | -                       | 127.8       | 56.6         | 34.1                    | -     | 78.2         |
